# Supplementary material for: H9N2 virus-derived M1 protein promotes H5N6 virus release in mammalian cells: Mechanism of avian influenza virus inter-species infection in humans
Source: PubMed Central journal article supplement (PMC8641880; doi:10.1371/journal.ppat.1010098), 2021-12-03

HA

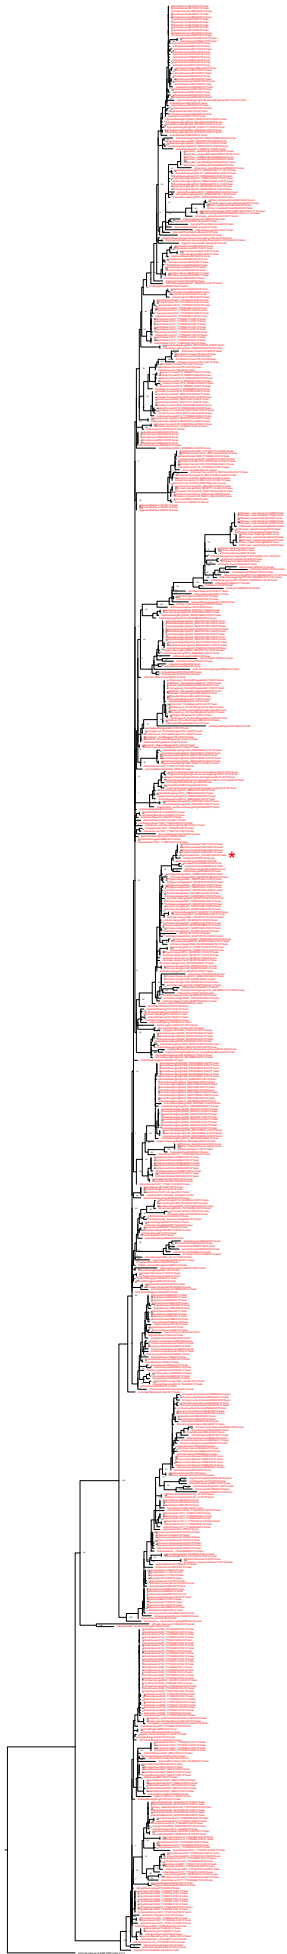

NA

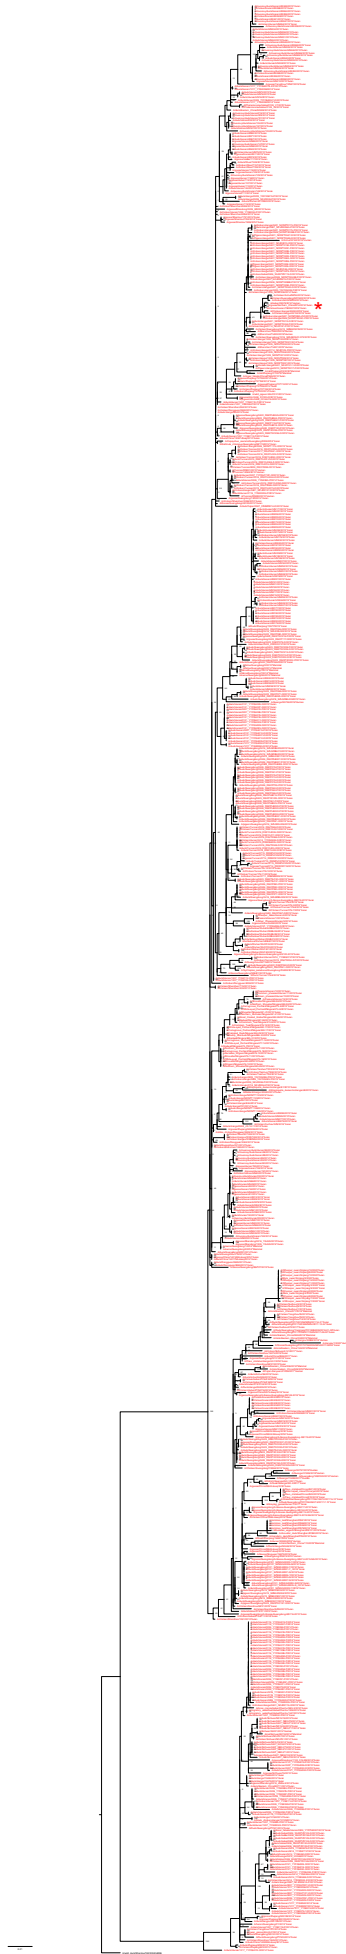

PB2

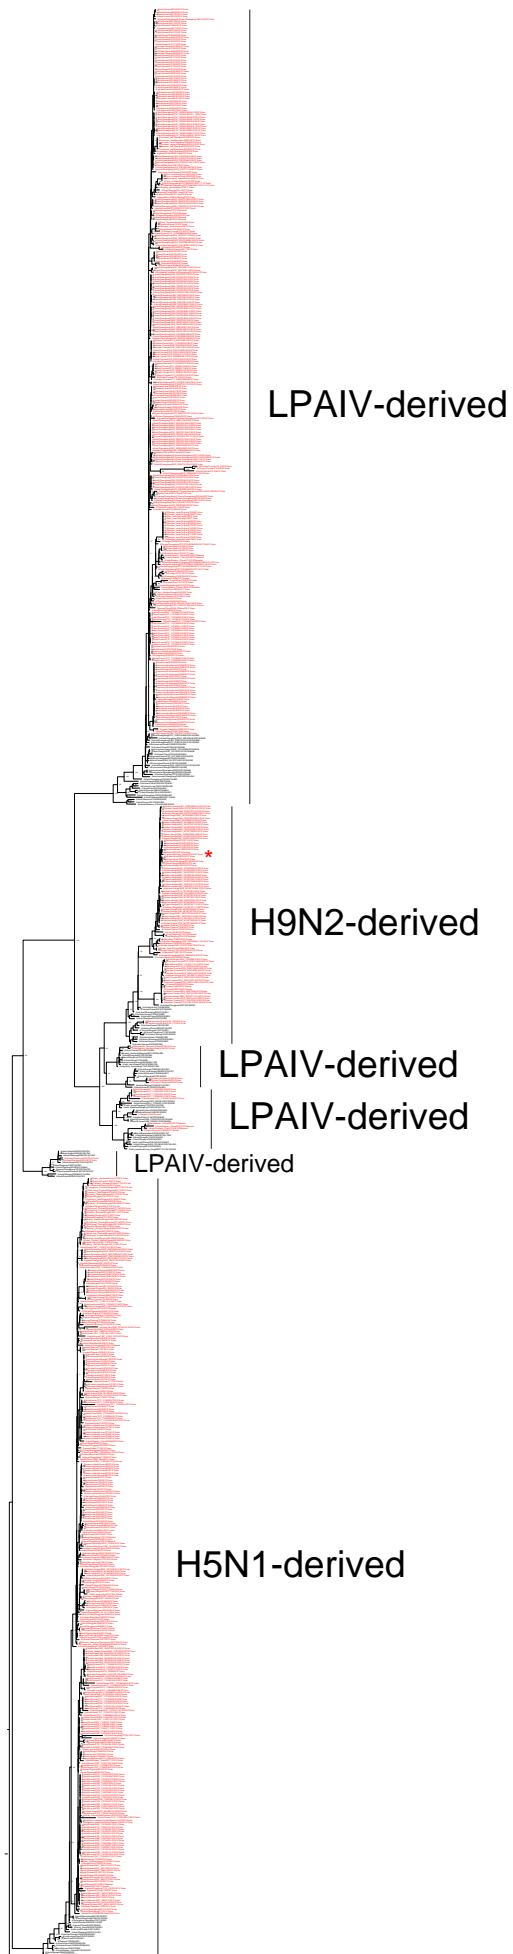

PB1

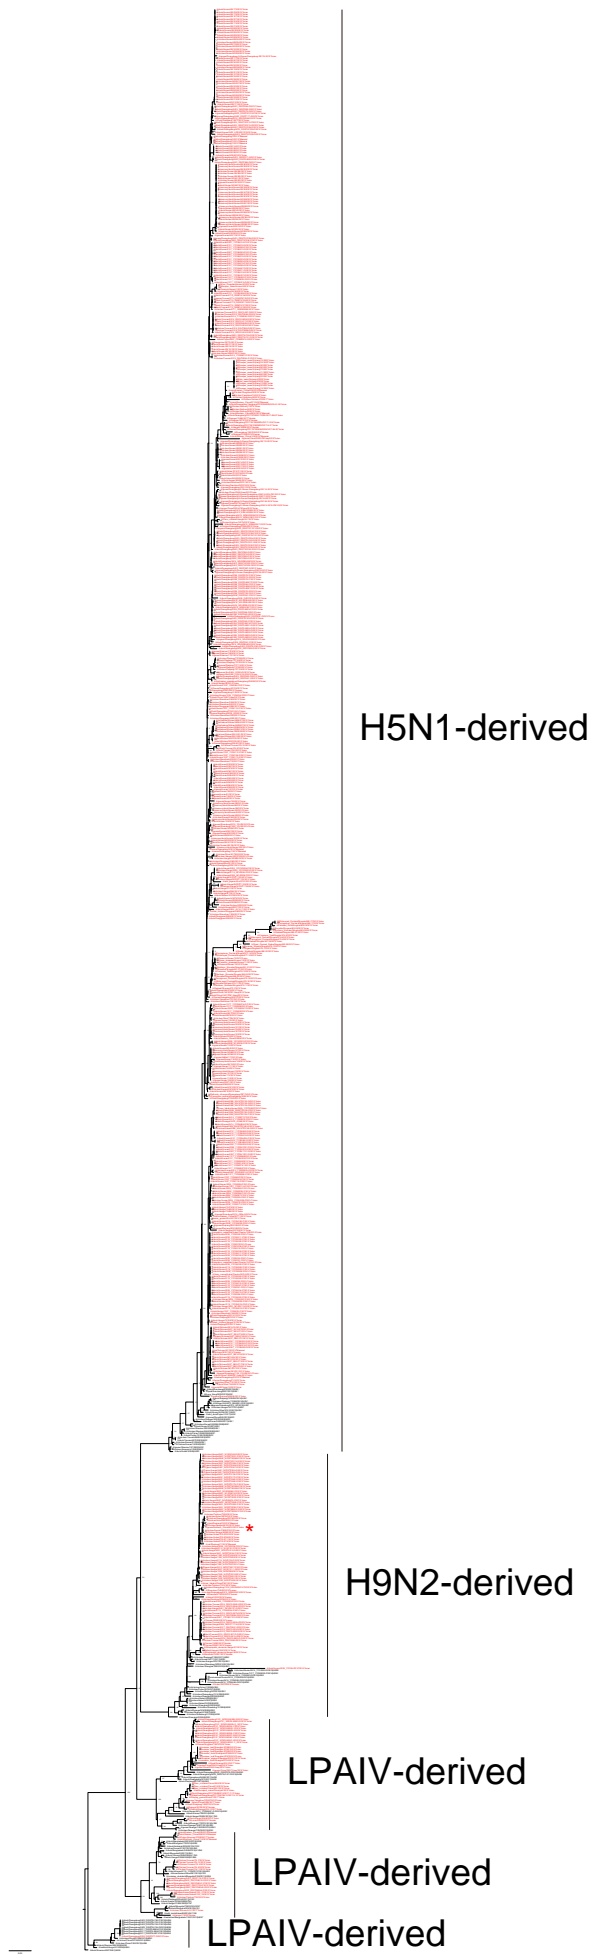

PA

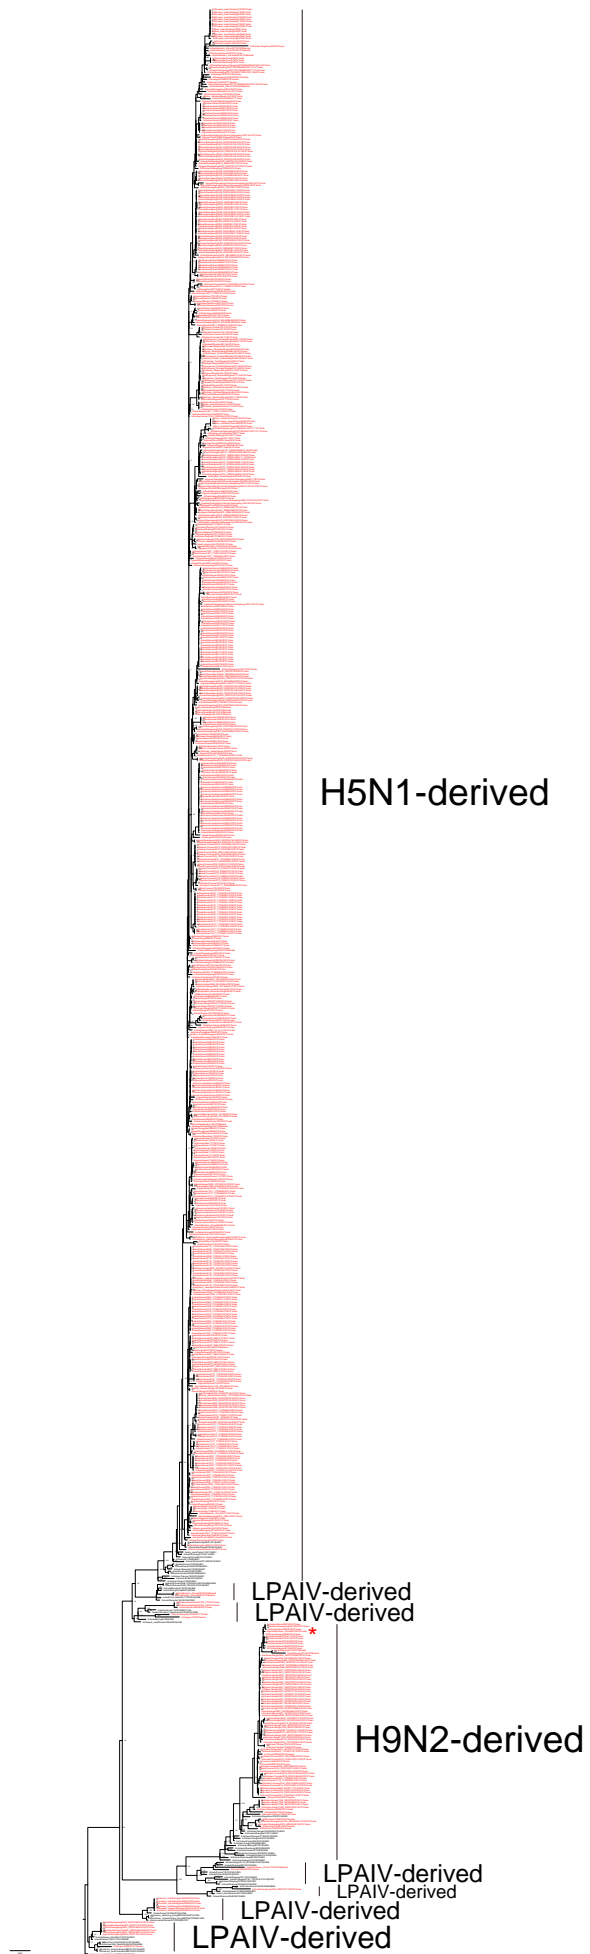

NP

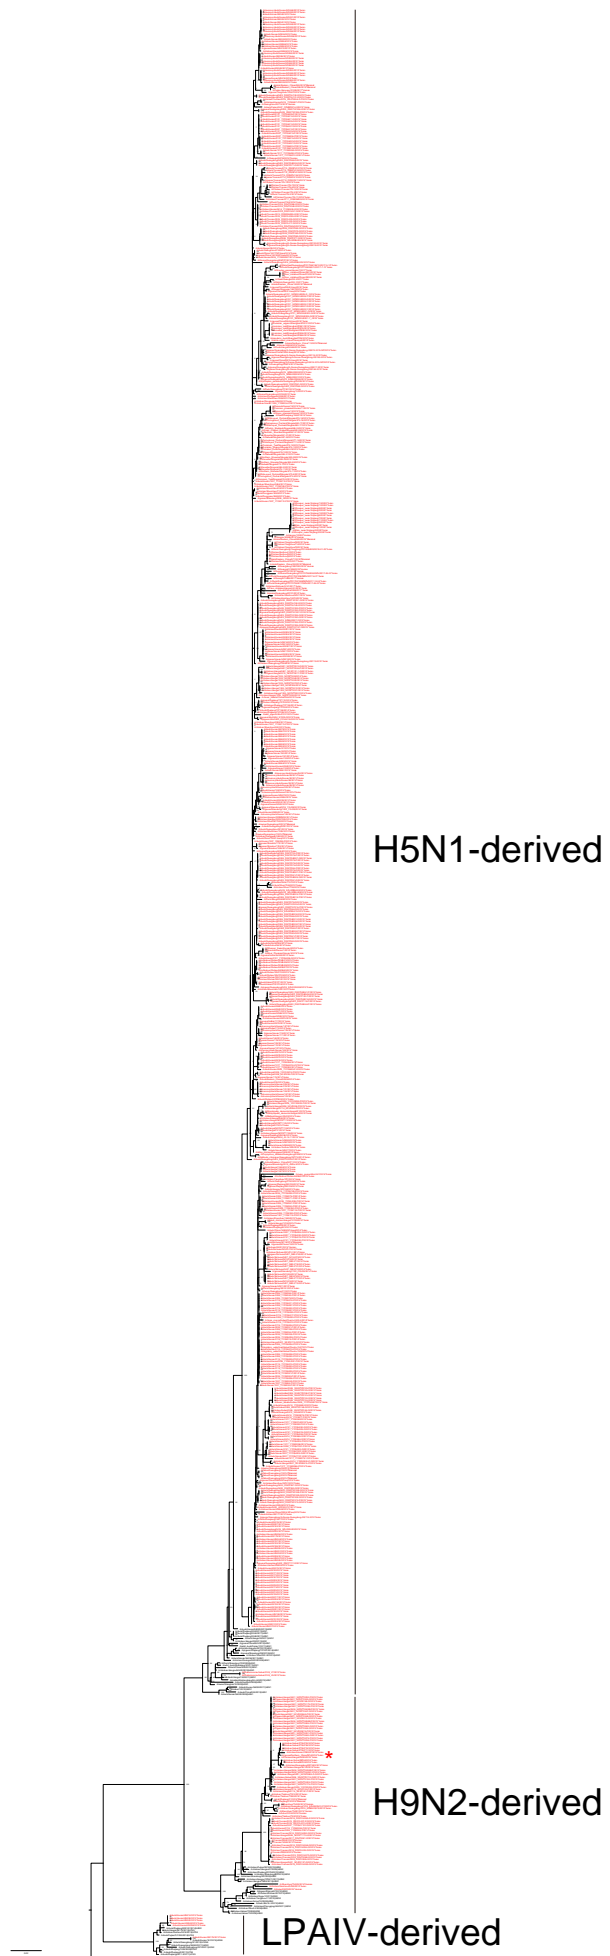

M

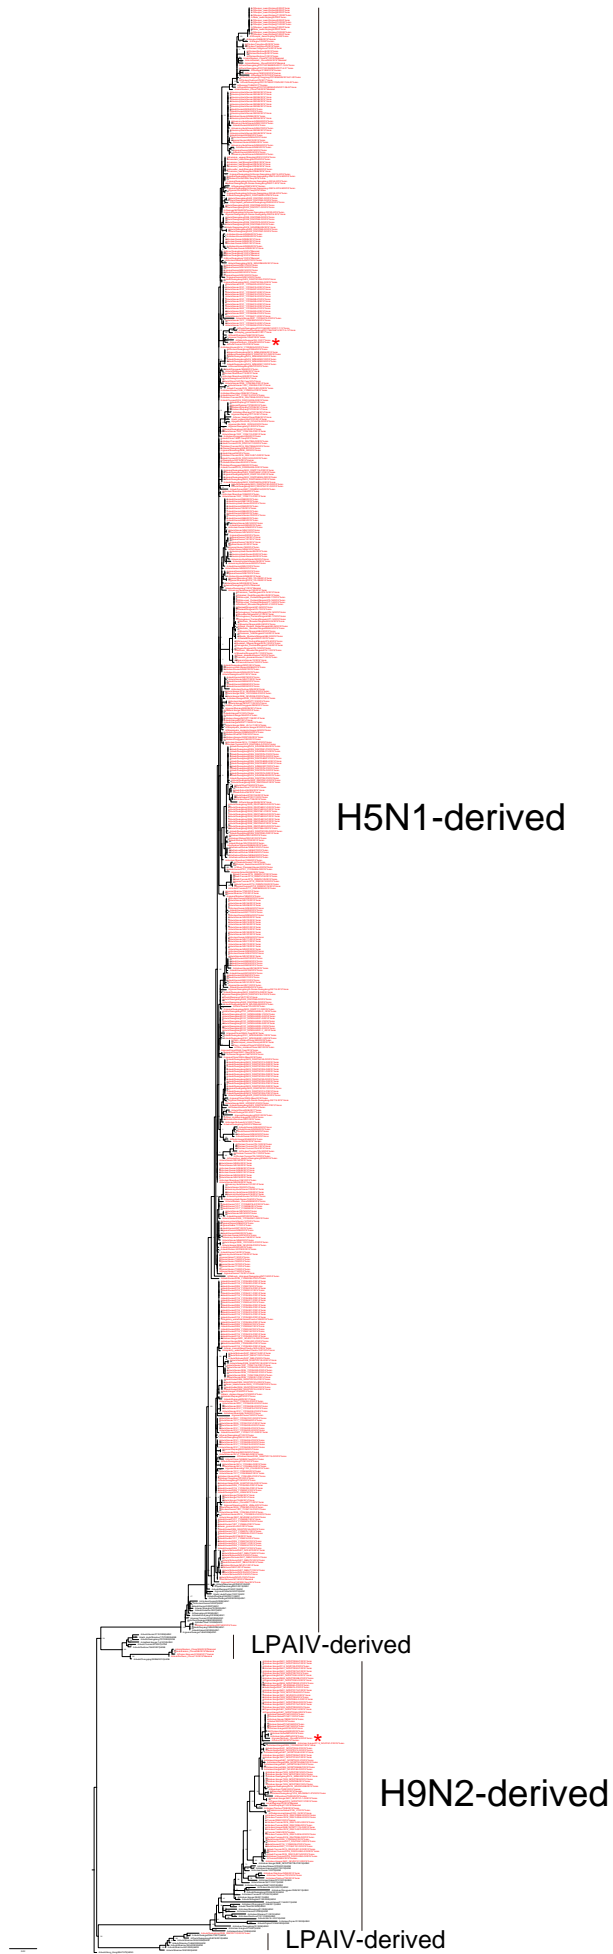

NS

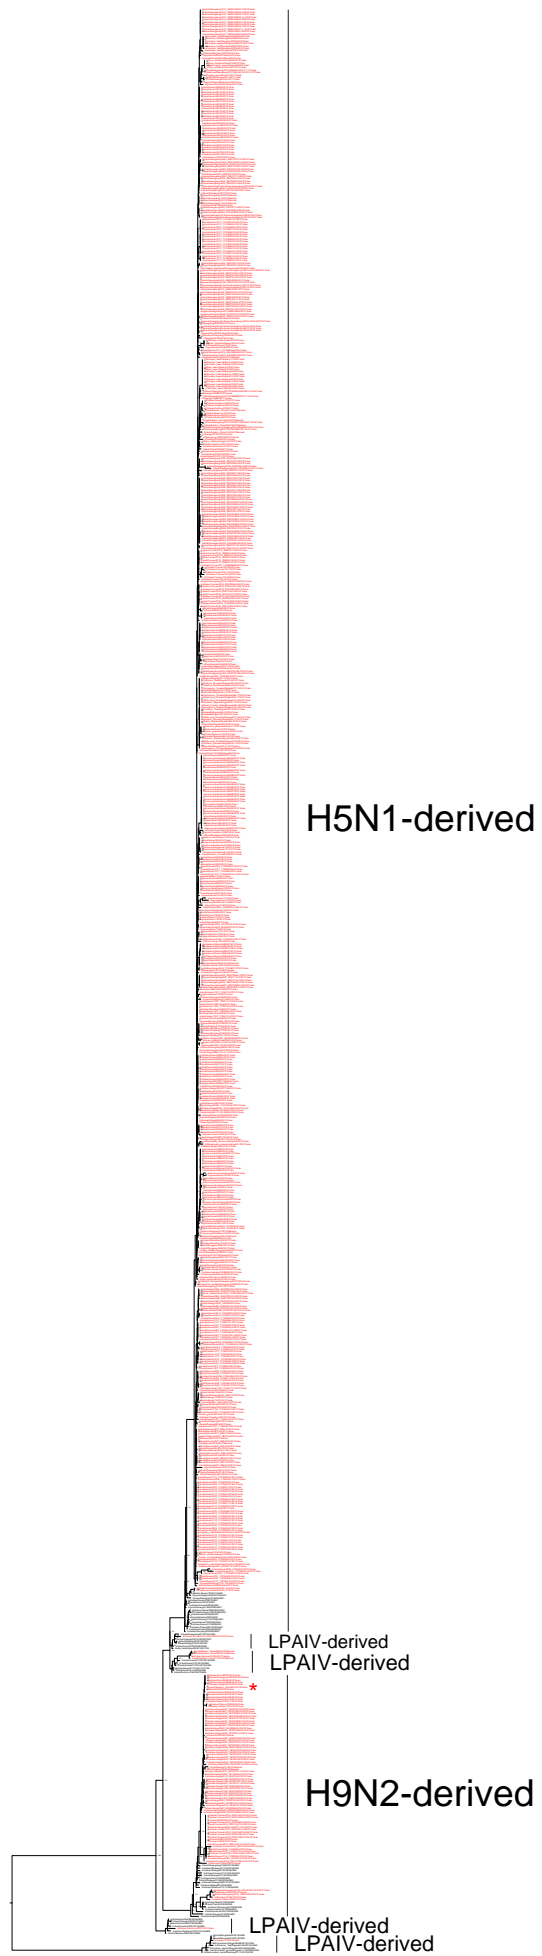

Supplement: ppat.1010098.s001.pdf [file ppat.1010098.s001.pdf]
